# Supplementary material for: Research on the Spatial Pattern and Formation Mechanism of Traditional Village Toponymic Cultural Heritage in Yunnan Province, China
Source: Research Square preprint supplement (doi:10.21203/rs.3.rs-7421672/v1), 2025-09-23
Supplement: Supplementary file 1 [file e2cb3fcc111cd94f3abba1c4.xlsx]

## Sheet: Sheet1
Level 1 category	Level 2 category	Number of items	Proportion (%)	Level 3 category	Number of items	Proportion (%)	Description
Natural	Positional sequences	88	0.1124	Positional sequences	88	0.1124	Relative directional or ordinal expressions (e.g., southeast, first, upper/lower).
	Landscape	189	0.2414	Mountains	22	0.0281	Named for adjacent mountains or relative mountain names (e.g., Guifeng Village).
				Hydrology	71	0.0907	Named for nearby water systems or water forms (e.g., Bixi Village).
				Landform	58	0.0741	Local terrain and geomorphological features.
				Fields	12	0.0153	Status of arable land (e.g., Gaotian Village, Xiao Huangdi Village).
				Coloration	7	0.0089	Prominent local material color (e.g., Baisha Village).
				Climate	19	0.0243	Common local meteorological traits (e.g., Yunding Village, Yulu Village).
	Fauna–flora–mineral resources	128	0.1635	Fauna	25	0.0319	Domestic or wild animals (e.g., deer, horse).
				Flora	90	0.1149	Local trees and plants (e.g., pine, walnut, tea).
				Minerals	13	0.0166	Subterranean or extracted minerals (e.g., salt, metal ores).
Nature total					405	0.5172
Humanistic	Clan-related	94	0.1201	Surnames	37	0.0473	The village is named for the surname of the earliest settler or the most common surname in the village.
				Ethnicity	12	0.0153	Named for the ethnic group of villagers.
				Persons	45	0.0575	Named to commemorate individuals with notable deeds (e.g., ancestors, generals).
	Functional buildings	110	0.1405	Religion	12	0.0153	Named for religious buildings or sites.
				Military	22	0.0281	Villages established for military purposes (e.g., Yingpan Village).
				Settlements	37	0.0473	Named for specific groups or settlement types (e.g., Xinzhuang, Dacun).
				Commerce	22	0.0281	Villages formed around commercial buildings or activities.
				Politics	17	0.0217	Named for administrative offices or due to administrative division/edicts.
	Facilities	37	0.0473	Transportation	15	0.0192	Originating from transport nodes or routes (e.g., Yunnan post Village).
				Landmarks	7	0.0089	Originating from distinctive markers (e.g., Taden Village).
				Tools	15	0.0192	Named for widely used tools or notable local crafts.
	Emotionally connotative	137	0.175	Legends	48	0.0613	Named from folk tales or myths.
				Pray	89	0.1137	Named as expressions of hope for protection or well-being.
Humanistic total					378	0.4828
Total villages surveyed					783	1
